# Supplementary material for: Evaluation of candidate reference genes for gene expression analysis in the brassica leaf beetle, Phaedon brassicae (Coleoptera: Chrysomelidae)
Source: PubMed Central journal article supplement (PMC8174695; doi:10.1371/journal.pone.0251920), 2021-06-03

The agarose gel electrophoresis of eight candidate reference genes. M, marker; Templates in the PCR reactions were as follows: 1) Actin2; 2) GAPDH; 3) RPL32; 4)  $\alpha$ -TUB; 5) Actin1; 6) Ef-1 $\alpha$ ; 7) TBP; and 8) RPL19.

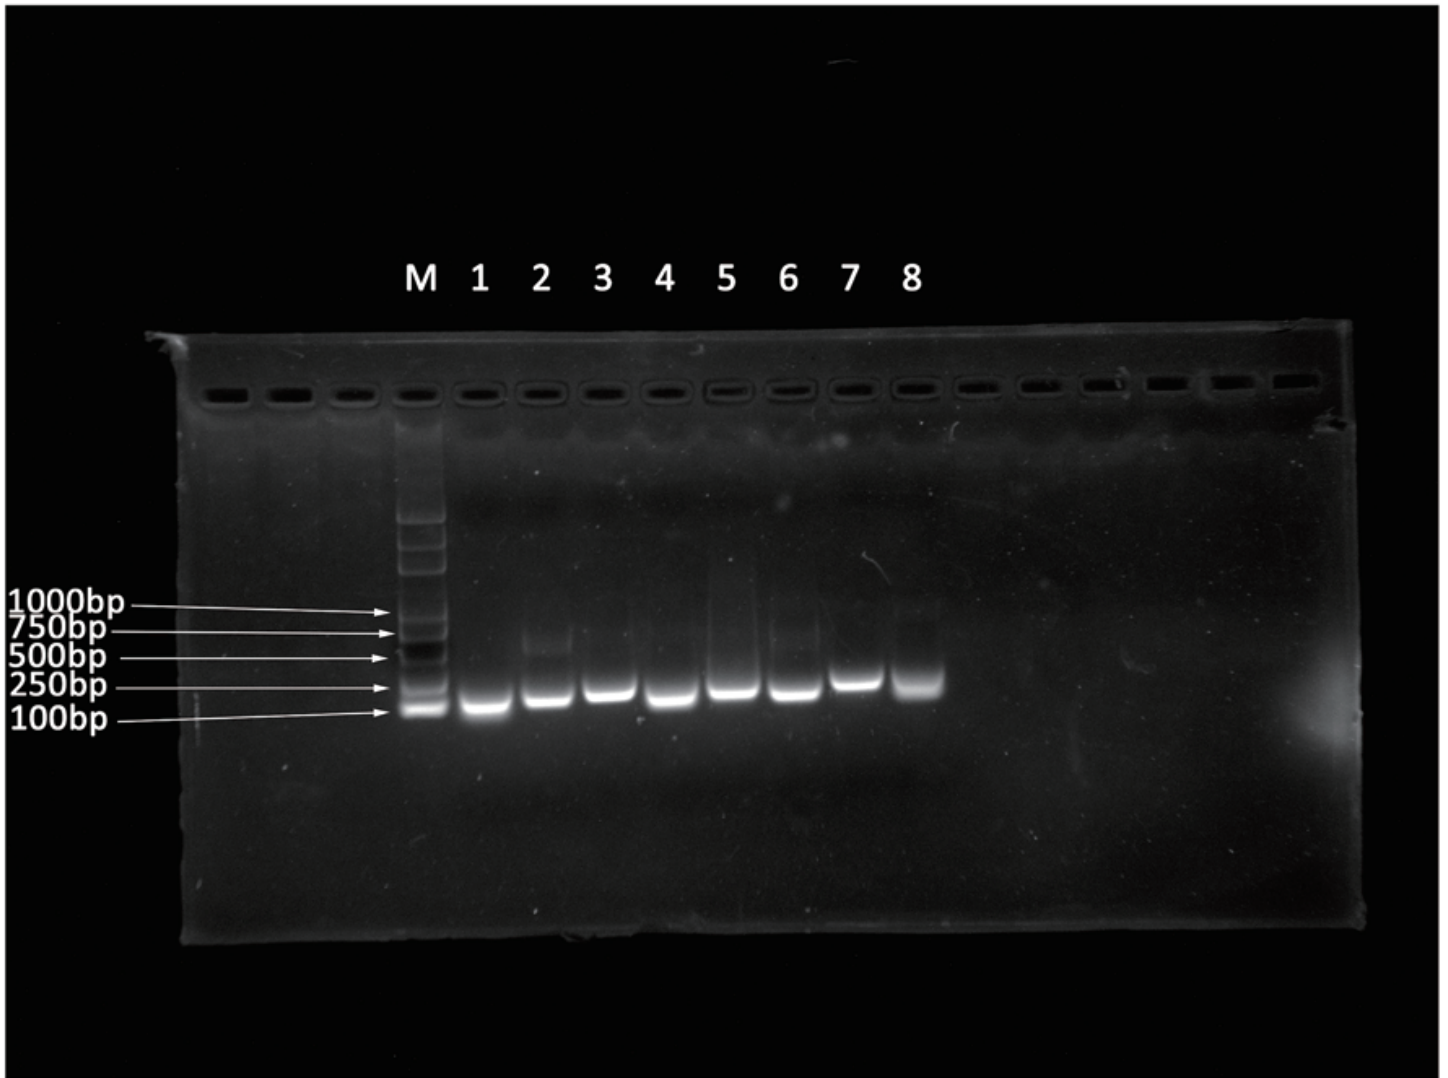

Supplement: pone.0251920.s005.pdf [file pone.0251920.s005.pdf]
